# Supplementary material
Source: PubMed Central journal article supplement (PMC4468537)
Supplement: IAI.03096-14_zii999091299so1.pdf [file IAI.03096-14_zii999091299so1.pdf]

Figure S1

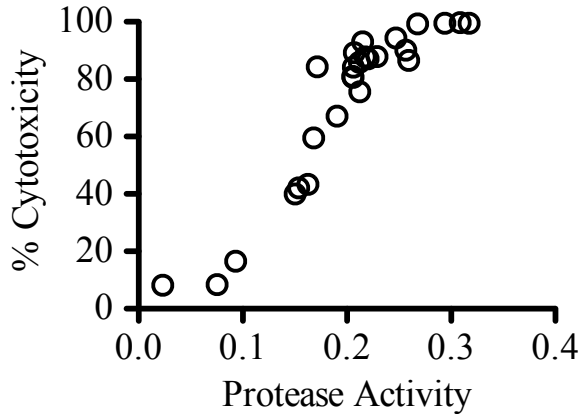

**Figure S1. Correlation between protease production and cytotoxicity by ocular clinical *S. marcescens* isolates and strain PIC3611.**

**Significant correlatoin of cytotoxicity to HCLE cells to secreted protease activity (Pearson  $r=0.925$ ,  $p<0.001$ ).**

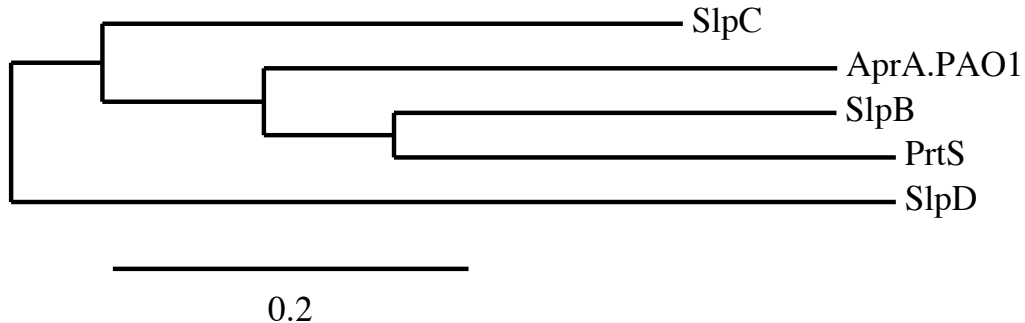

**Figure S2. Phylogram of putative *S. marcescens* metalloproteases.** Comparison of amino acid sequences of alkaline protease (AprA) from *Pseudomonas aeruginosa*, serralyisin (PrtS) and candidate metalloproteases from *S. marcescens* using the “one-click” mode tree rendering program from [www.Phylogeny.fr](http://www.Phylogeny.fr) using default settings. Number of substitutions per site are proportional to the branch length.

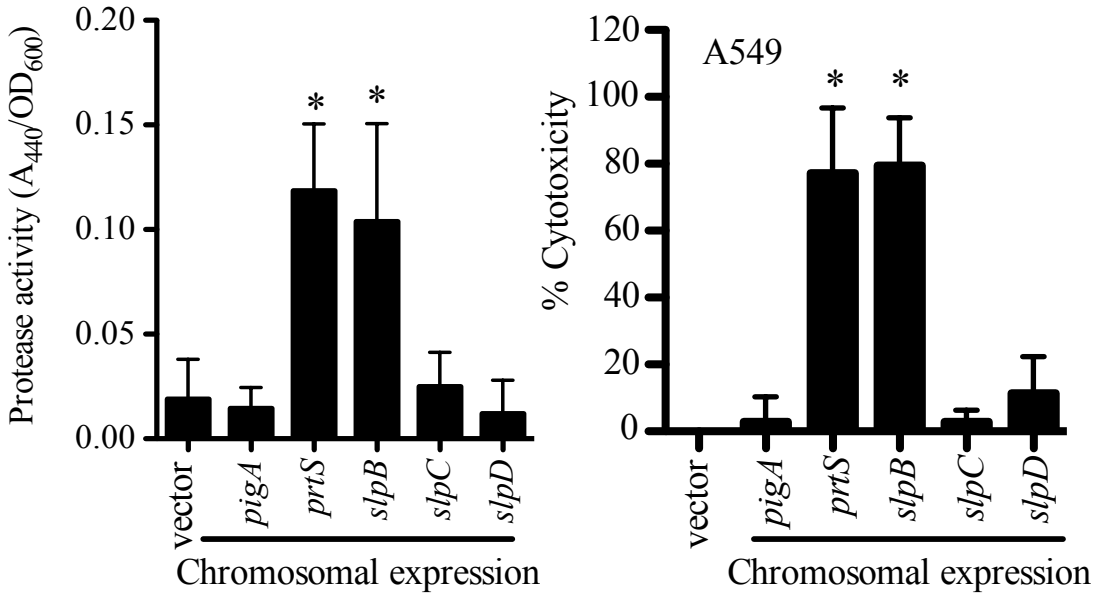

**Figure S3. Cytotoxicity to human epithelial cell lines and protease activity of induced putative metalloprotease genes.** Induction of putative metalloprotease genes (no His<sub>7</sub>-tag) from the PIC3611 chromosome was followed by measuring cytotoxicity of epithelial cells challenged by filtered and normalized supernatants of cultures grown overnight. **A.** Protease activity measured using azocasein. **B.** Cytotoxicity to A549 airway cells were challenged with secretomes. Negative controls include the episome pMQ131 (vector) that, like pMQ200, has a kanamycin resistance gene as a selectable marker, and chromosomal induction of the non-protease gene *pigA*. For each panel the average and standard deviation are shown (n≥3 independent experiments). Asterisk indicates that the supernatants were significantly more cytotoxic than the vector control supernatant as determined by ANOVA with Tukey's post-test.

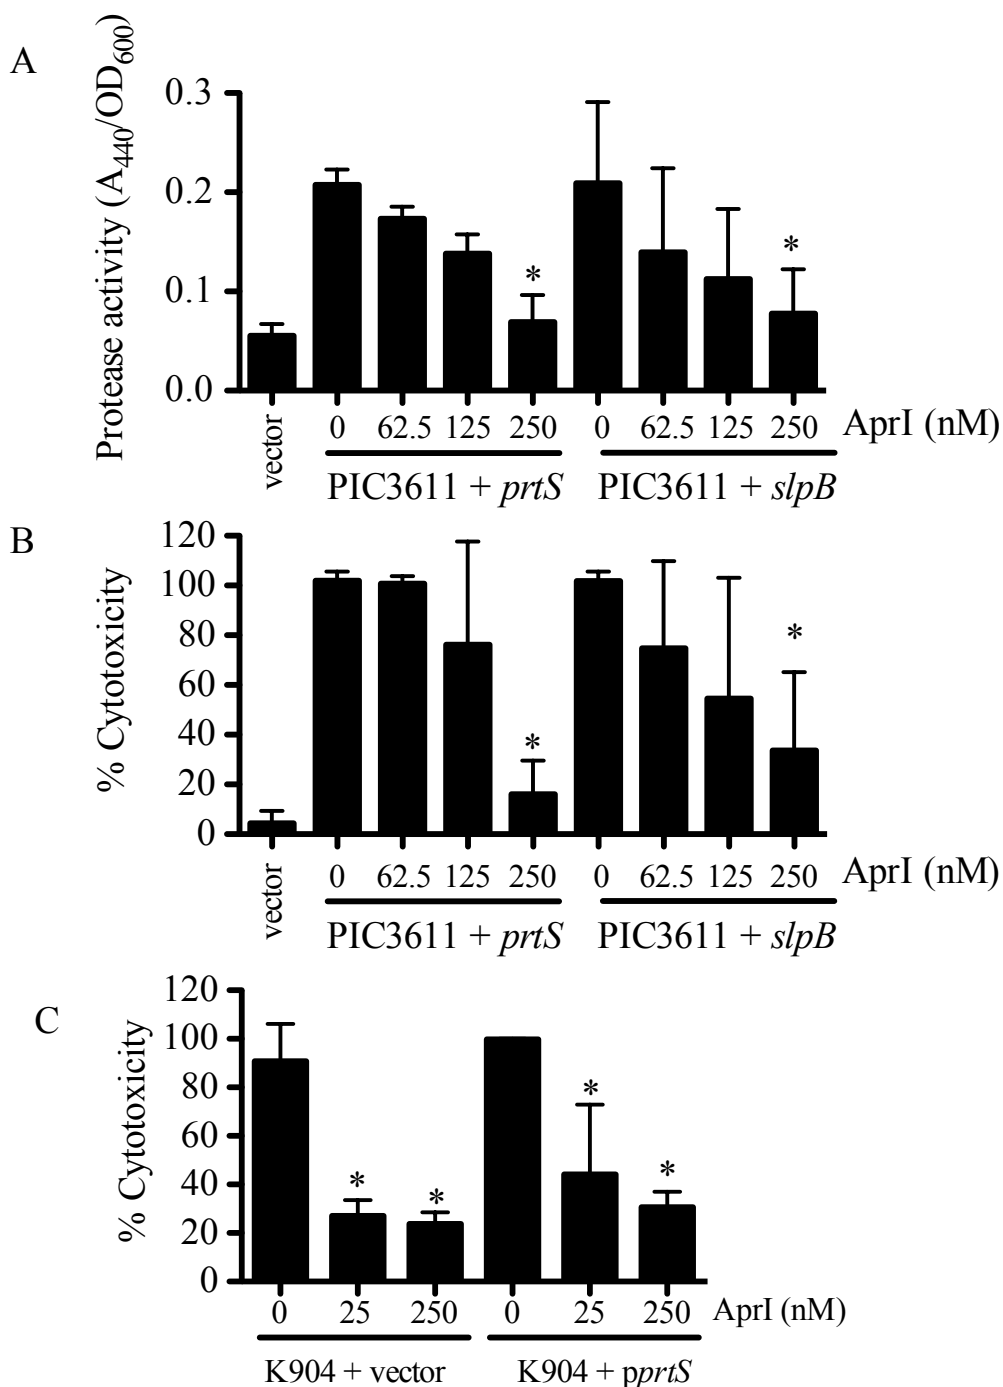

**Figure S4. AprI inhibition of PrtS and SlpB activity and cytotoxicity by K904 supernatants.** **A.** Protease activity as measured using azocasein. AprI inhibition of protease activity of filtered and normalized supernatants from PIC3611 with pMQ125 (vector), pMQ356 (*prtS*), and pMQ436 (*slpB*),  $n=3$  for vector, 5 for other groups. **B.** Inhibition of cytotoxicity to A549 cells from PrtS and SlpB induced from PIC3611,  $n=8$ . **C.** Cytotoxicity to A549 cells by secretomes from K904 with either pMQ125 (vector) or pMQ356 (*prtS*). Means and averages are shown; asterisk indicates significantly different from the respective 0 nM AprI addition group by ANOVA with Tukey's post-test ( $p<0.05$ ).

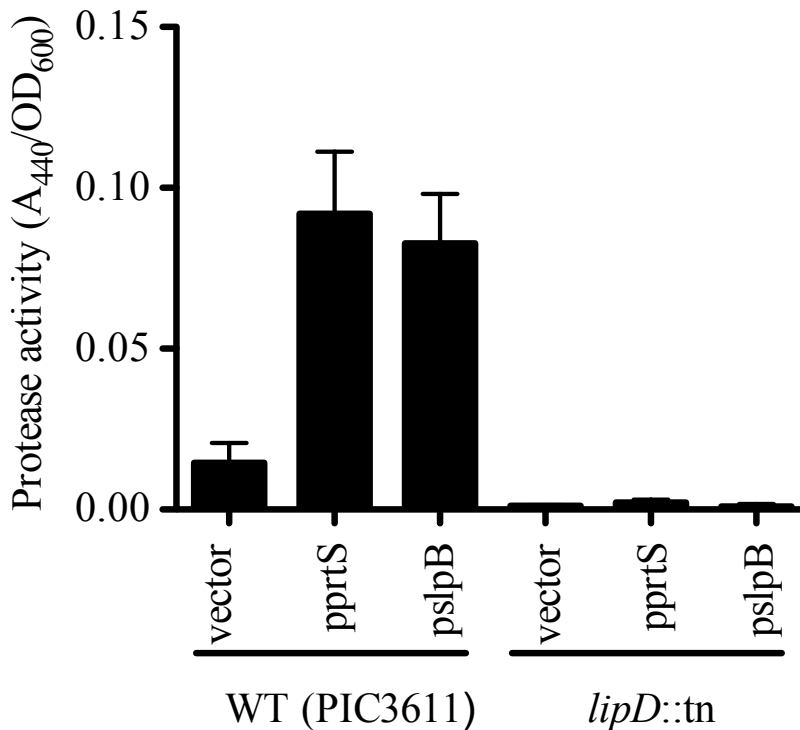

**Figure S5. LipD is necessary for secretion of SlpB.** Protease activity from bacterial supernatants using azocasein as a substrate normalized to culture densities. N=9 independent replicates from 3 separate experiments. Mean and standard deviations are shown. Vector = pMQ125, *pprtS* = pMQ356, *pslpB* = pMQ436.

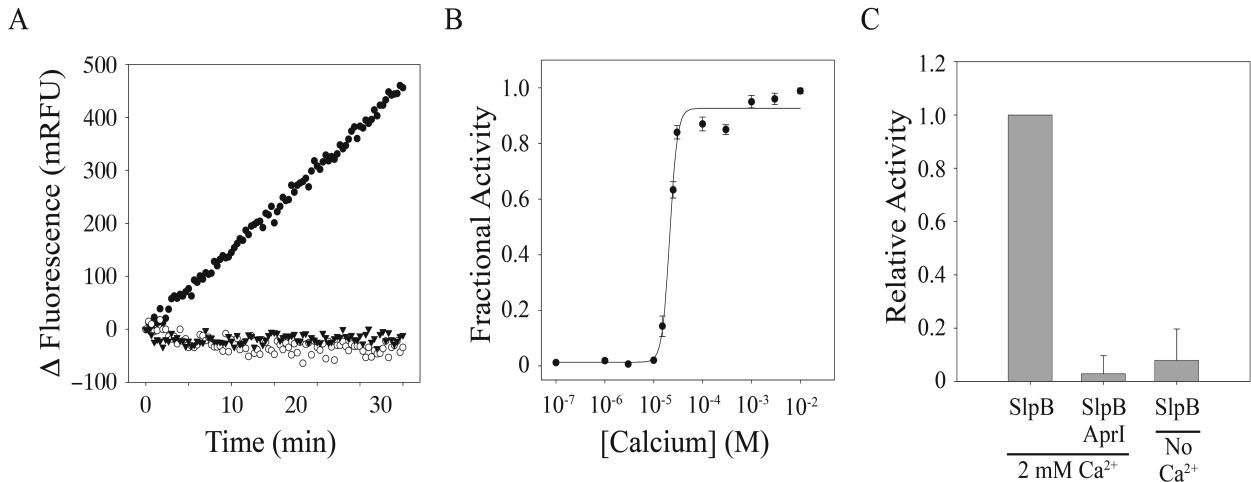

**Figure S6. SlpB is a Ca<sup>2+</sup>-regulated protease.** The Ca<sup>2+</sup>-induced activation of SlpB was assessed in vitro.

**A.** Protease activity was assessed after refolding in the presence and absence of 2 mM Ca<sup>2+</sup> using a fluorescent peptide substrate. Protease refolded in the presence of 2 mM Ca<sup>2+</sup> (closed circles) resulted in active protease, as measured kinetically as an increase in substrate fluorescence. This activity was not seen when the protease was refolded in the absence of Ca<sup>2+</sup> (open circles) or in buffer controls (closed triangles).

**B.** Calcium titrations were performed to assess the apparent affinity of SlpB and its activation by Ca<sup>2+</sup>. The activation of SlpB by Ca<sup>2+</sup> was fit with the Hill equation and determined the apparent Ca<sup>2+</sup> affinity to be 22 μM with a Hill coefficient of 5.5. **C.** Protease activity was assessed in the presence and absence of the *P. aeruginosa* AprI protease inhibitor. Inclusion of stoichiometric concentrations of the inhibitor resulted in complete inhibition of the SlpB protease. Data shown are mean +/- standard deviation from at least three independent experiments.

**Table S1. Oligonucleotide primers used in this study.**

| Primer Number     | Primer Sequence <sup>a</sup>                                                    |
|-------------------|---------------------------------------------------------------------------------|
| 2638 <sup>b</sup> | AACTGGAGGAAGGTGGGGAT                                                            |
| 2639 <sup>b</sup> | AGGAGGTGATCCAACCGCA                                                             |
| 3174              | GGCCTGTTCGACTACAGCTC                                                            |
| 3175              | TAGCGTAGGTGATGCTGACG                                                            |
| 3186              | GCTTTCATTGCAATCCTGGT                                                            |
| 3187              | TAATTGCCGGGATGAGAAAG                                                            |
| 3177              | GATGCCGCCTATTATCAGGA                                                            |
| 3178              | CTGTAGCCGGAGAAGTCCAG                                                            |
| 1791              | GACGACCTGCTGCATTATCA                                                            |
| 1793              | GGCTGGCCAAATACCTTGTA                                                            |
| 1908              | aaattctgtttatcagaccgcttctcggttctgatTTACACGATAAAGTCAGTGGCGAC                     |
| 1909              | ttgtgagcggataacaatttcacacaggaacagctATGTCTATCTGTCTGATTGATATC                     |
| 2352              | ctctctactgtttccatacccgtaggagaaaaaATGTCTATCTGTCTGATTGATATC                       |
| 2500              | tttccatacccgtaggagaaaaaatgaccatg <u>CACCACCATCACCACCATCACGCCGCCACAACCGTTACG</u> |
| 1542              | agtgccaagcttgcctgcaggtcagctctagaCGATCGCAGTTGGCACGACAAGG                         |
| 1543              | acacaggaacagctatgaccatgattacgaattcgaGCACCGTAGAAATGCTGGATCG                      |
| 1912              | ttctgtttatcagaccgcttctcggttctgatTTACGCCAACACGAAATCGCCGGCATC                     |
| 1913              | attgtgagcggataacaatttcacacaggaacagctGTTATGTCATCAAGCAATGCTTC                     |
| 2355              | caactctactgtttccatacccgtaggagaaaaaATGTCATCAAGCAATGCTTCC                         |
| 2493              | gaattgtgagcggataacaatttcacacaggaacagctCGGCAATCGTCACCTGTTGTC                     |
| 2496              | cgcgccggtggcggtaggaagtgcgatcgccgcaccagctccaggccgcttttc                          |
| 3194              | gaaaaaatgaccatgcaccaccatcaccaccatcacTCATCAAGCAATGCTTCCGTTAAG                    |
| 1916              | aaattctgtttatcagaccgcttctcggttctgatCTAGACGAGAATATCGGCCGGAAGC                    |
| 1917              | gaattgtgagcggataacaatttcacacaggaacagctATGTCATTAGCGACCGATAAG                     |
| 2358              | caactctactgtttccatacccgtaggagaaaaaATGTCATTAGCGACCGATAAG                         |

3196 gaaaaaatgaccatgcaccaccatcaccaccatcacTCATTAGCGACCGATAAGATTTC  
1920 aaattctgtttatcagaccgttctgcgttctgatTCAGGCAAACAAAATATCGCTCTG  
1921 gaattgtgagcggataacaatttcacacaggaacagctATGCGCAGTCGCCACAACGAC  
2361 caactcttactgtttctccatacccgtaggaggaaaaATGCGCAGTCGCCACAACGAC  
3198 gaaaaaatgaccatgcaccaccatcaccaccatcacCGCAGTCGCCACAACGACATTTTG  
2977 ctgcgcaactgttgggaaggcgatcgggtcgggctTCATAGTGAATATGTTGTTATCG  
2978 ttgtgagcggataacaatttcacacaggaacagctATGTCTACGCATATTGGCGAGCC

---

a. lower case letters are regions for yeast recombination and upper case letters are for amplification, underlined letters indicate the polyhistidine tag.

b. from Lin, et. al. (2)



**Table S2. Metalloprotease homologs of *S. marcescens* strain Db11.**

| <b>Gene (ORF #)<sup>a</sup></b>     | <b>Peptidase_M10_C<br/>superfamily<br/>domain<br/>Pfam08548<sup>b</sup></b> | <b>% AA<br/>identity to<br/>PrtS / AprA<sup>c</sup></b> | <b>Predicted<br/>Mass of<br/>proprotein</b> | <b>HEXXHXUGUXH<br/>Zinc-binding motif<br/>Sequence<sup>d</sup></b> |
|-------------------------------------|-----------------------------------------------------------------------------|---------------------------------------------------------|---------------------------------------------|--------------------------------------------------------------------|
| <i>prtS</i> (serralysin)<br>SMA4311 | 2e-85                                                                       | 100 / 54                                                | <b>54</b>                                   | HEIGHALGLSH                                                        |
| <i>slpB</i><br>SMA1367              | 2e-88                                                                       | 52.6 / 55                                               | <b>50.4</b>                                 | HEIGHALGLQH                                                        |
| <i>slpC</i><br>SMA2486              | 4e-74                                                                       | 50.3 / 50                                               | <b>49</b>                                   | HEIGHALGLSH                                                        |
| <i>slpD</i><br>SMA1606              | 2e-63                                                                       | 45 / 44                                                 | <b>57</b>                                   | HEIGHALGLSH                                                        |

<sup>a</sup> ORF number according to the DB11 genome sequence.

<sup>b</sup> Serralysin C-terminal calcium ion binding domain. Value determined by NCBI BLAST (3).

<sup>c</sup> Identity determined by BLAST with  $\geq 95\%$  query coverage for each protein. AprA is alkaline protease from *P. aeruginosa*, PrtS is serralysin.

<sup>d</sup> HEXXHXUGUXH = consensus sequence U= Bulky Hydrophobic Amino Acid, X = Arbitrary Amino Acid.

## Supplementary Materials References

- 1. Guindon S, Lefort V, Lescot M, Claverie JM, Gascuel O.** 2008. Phylogeny.fr: robust phylogenetic analysis for the non-specialist. *Nucleic Acids Res* **36**:W465-469.
- 2. Lin CS, Horng JT, Yang CH, Tsai YH, Su LH, Wei CF, Chen CC, Hsieh SC, Lu CC, Lai HC.** 2010. RssAB-FlhDC-ShlBA as a major pathogenesis pathway in *Serratia marcescens*. *Infect Immun* **78**:4870-4881.
- 3. Altschul SF, Madden TL, Schaffer AA, Zhang J, Zhang Z, Miller W, Lipman DJ.** 1997. Gapped BLAST and PSI-BLAST: a new generation of protein database search programs. *Nucleic Acids Res* **25**:3389-3402.
